# Supplementary material for: Agonistic and antagonistic properties of a Rhizobium sin-1 lipid A modified by an ether-linked lipid
Source: Royal Society of Chemistry journal article supplement (doi:10.1039/b704427e), 2007-01-01

## Electronic Supplementary Information

### **Agonistic and antagonistic properties of a *Rhizobium sin-1* lipid A modified by an ether-linked lipid**

**Mahalakshmi Vasan, Margreet A. Wolfert\* and Geert-Jan Boons\***

Complex Carbohydrate Research Center, The University of Georgia, 220 Riverbend Road, Athens, GA 30602

Fax (+)706-542-4412

e-mail: [gjboons@ccrc.uga.edu](mailto:gjboons@ccrc.uga.edu), [mwolfert@ccrc.uga.edu](mailto:mwolfert@ccrc.uga.edu)

#### **This pdf file includes:**

Figs. S1 and S2

NMR spectra synthetic compounds

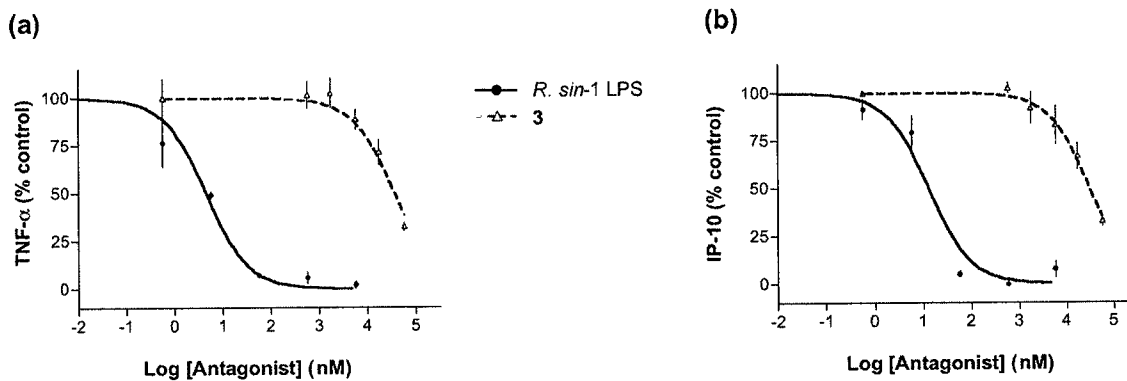

**Fig. S1** Antagonism of synthetic *E. coli* lipid A by *R. sin-1* LPS and synthetic compound 3 in human monocytic cells. TNF- $\alpha$  (a) and IP-10 (b) concentrations were measured after preincubation of MM6 cells with increasing concentrations of *R. sin-1* LPS or 3 as indicated for 1 h at 37°C, followed by 5.5 h of incubation with *E. coli* lipid A (100 ng mL<sup>-1</sup>). Results are expressed as percentage of cytokine concentration of control cells, which are incubated only with *E. coli* lipid A.

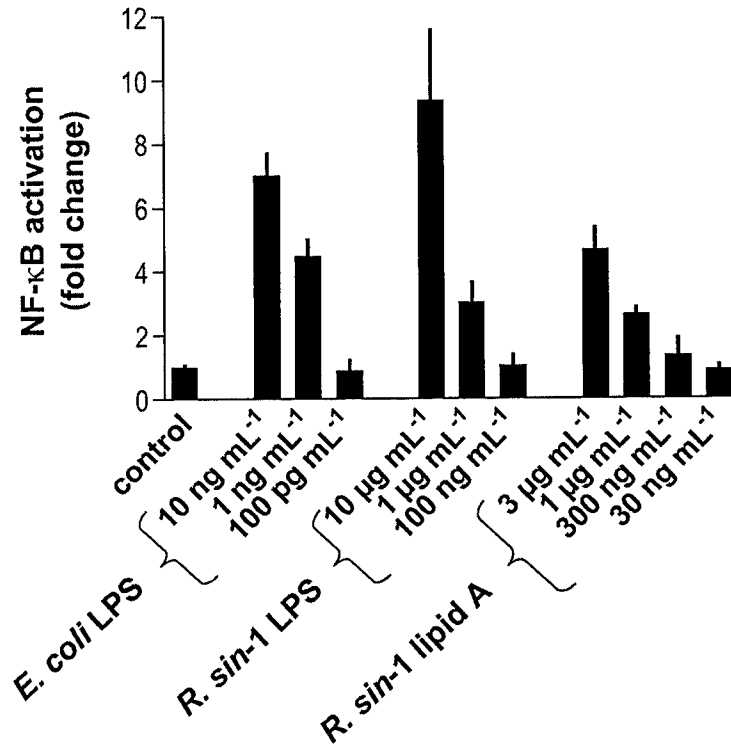

**Fig. S2** Response of HEK 293T cells expressing murine TLR4/MD2 to *E. coli* LPS, *R. sin-1* LPS and *R. sin-1* lipid A. Induction of NF-κB activation was determined in triplicate cultures of HEK 293T cells stably transfected with murine TLR4/MD2 and transiently transfected with pELAM-Luc, pRL-TK and pcDNA3 plasmids. Forty-four h post-transfection, cells were treated with *E. coli* LPS, *R. sin-1* LPS and *R. sin-1* lipid A at the indicated concentrations or were left untreated (control). Forty-eight h post-transfection, NF-κB activation was determined by firefly luciferase activity relative to *Renilla* luciferase activity. In the transfection experiment shown, human TNF-α (10 ng mL<sup>-1</sup>) induced 24.5 ± 0.6-fold activation of NF-κB.

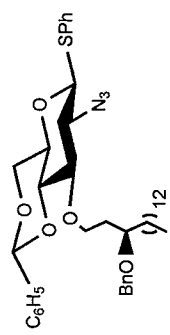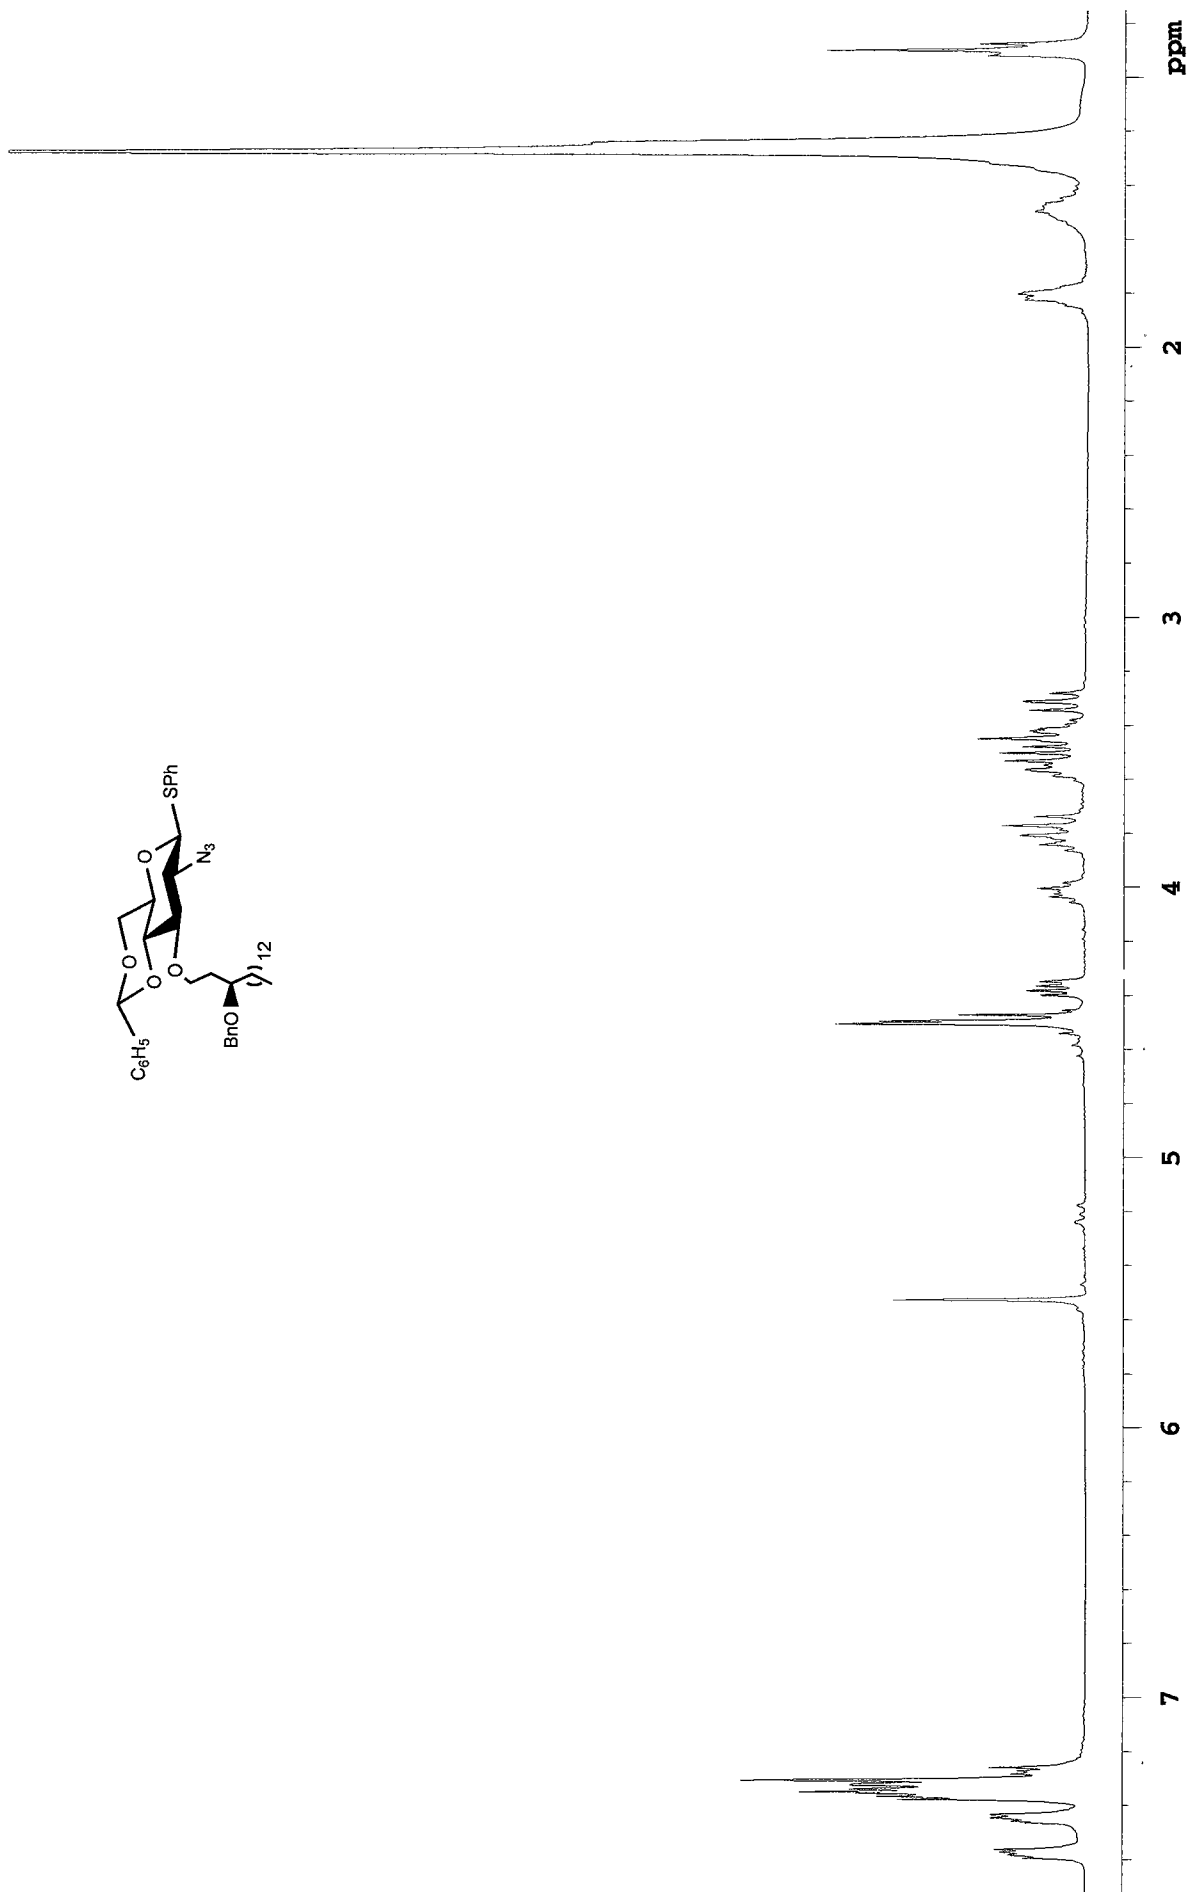



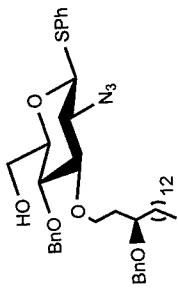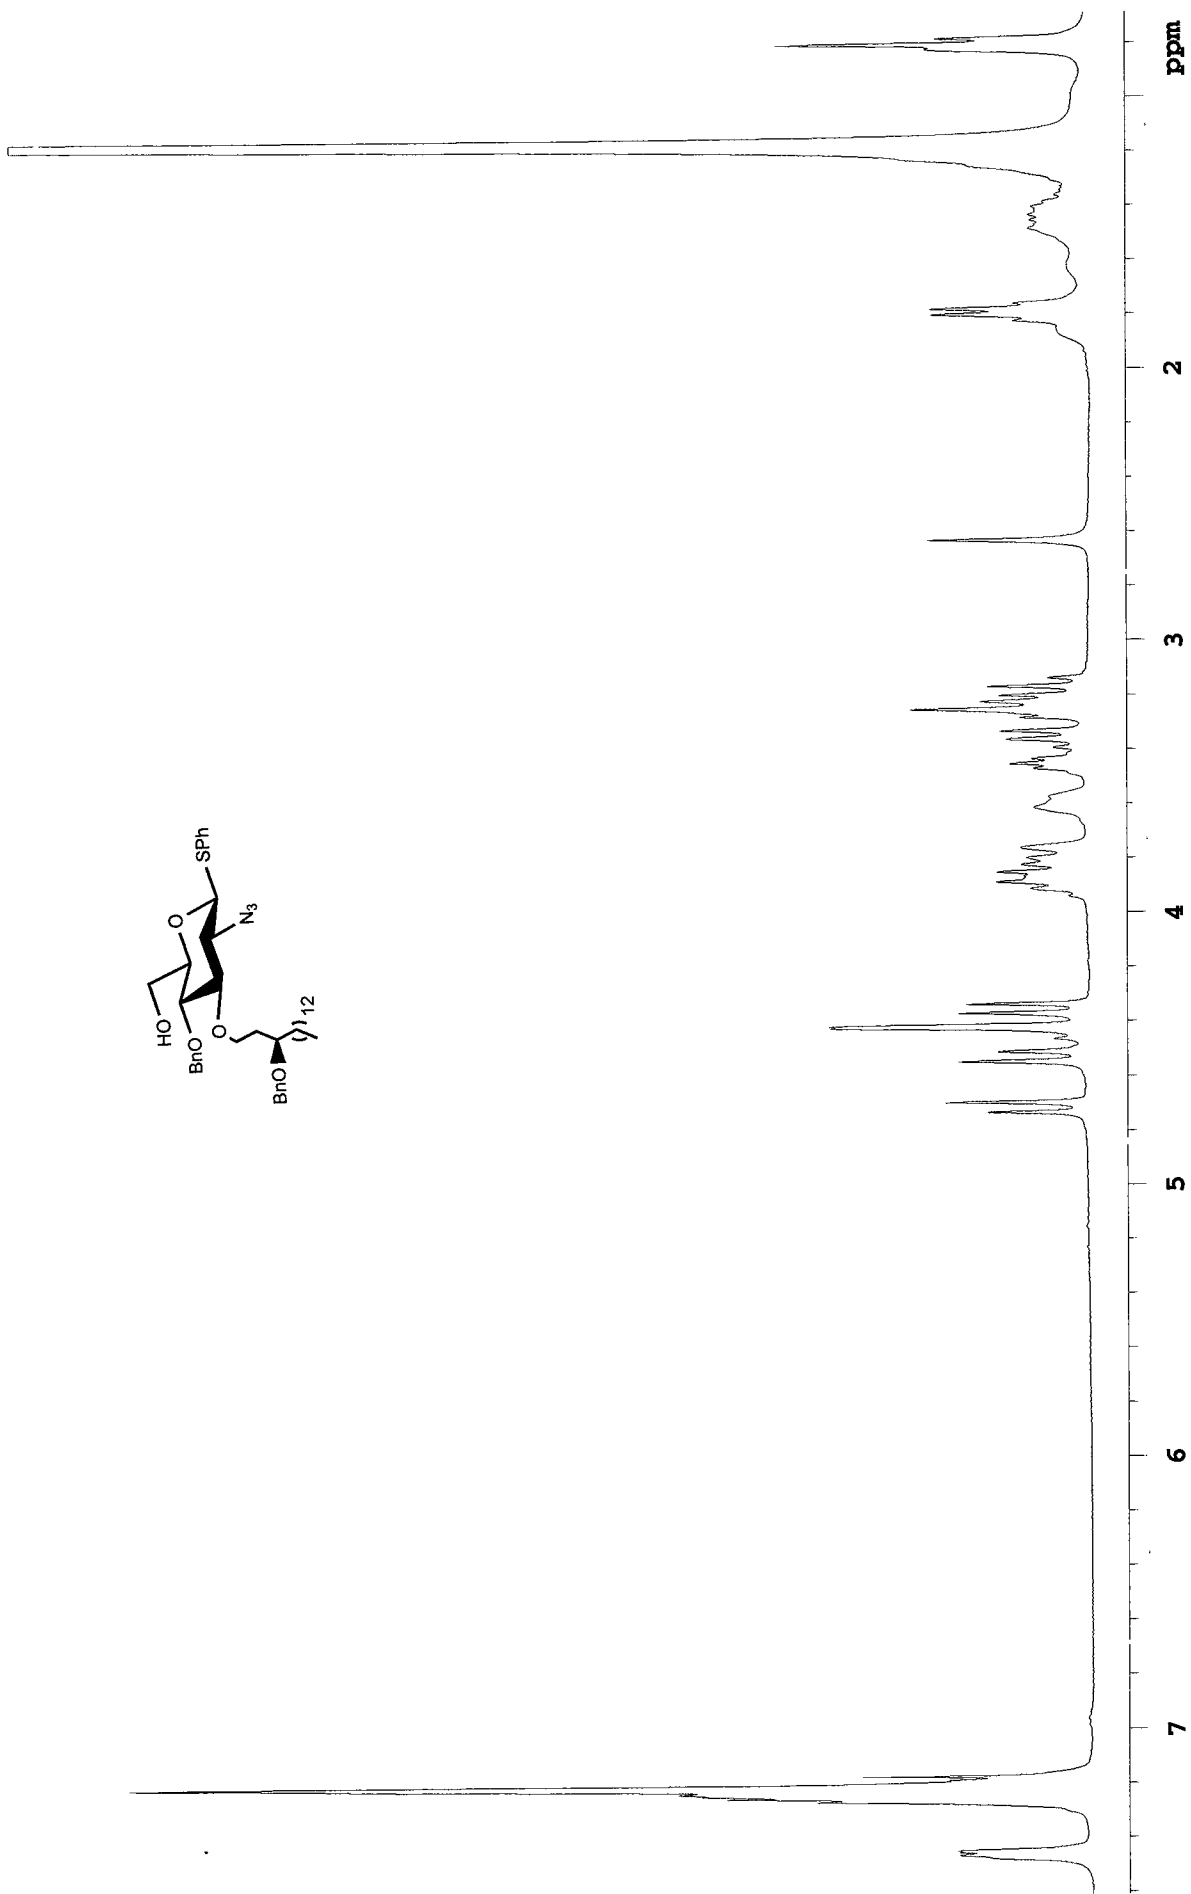

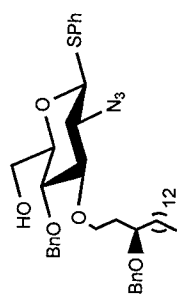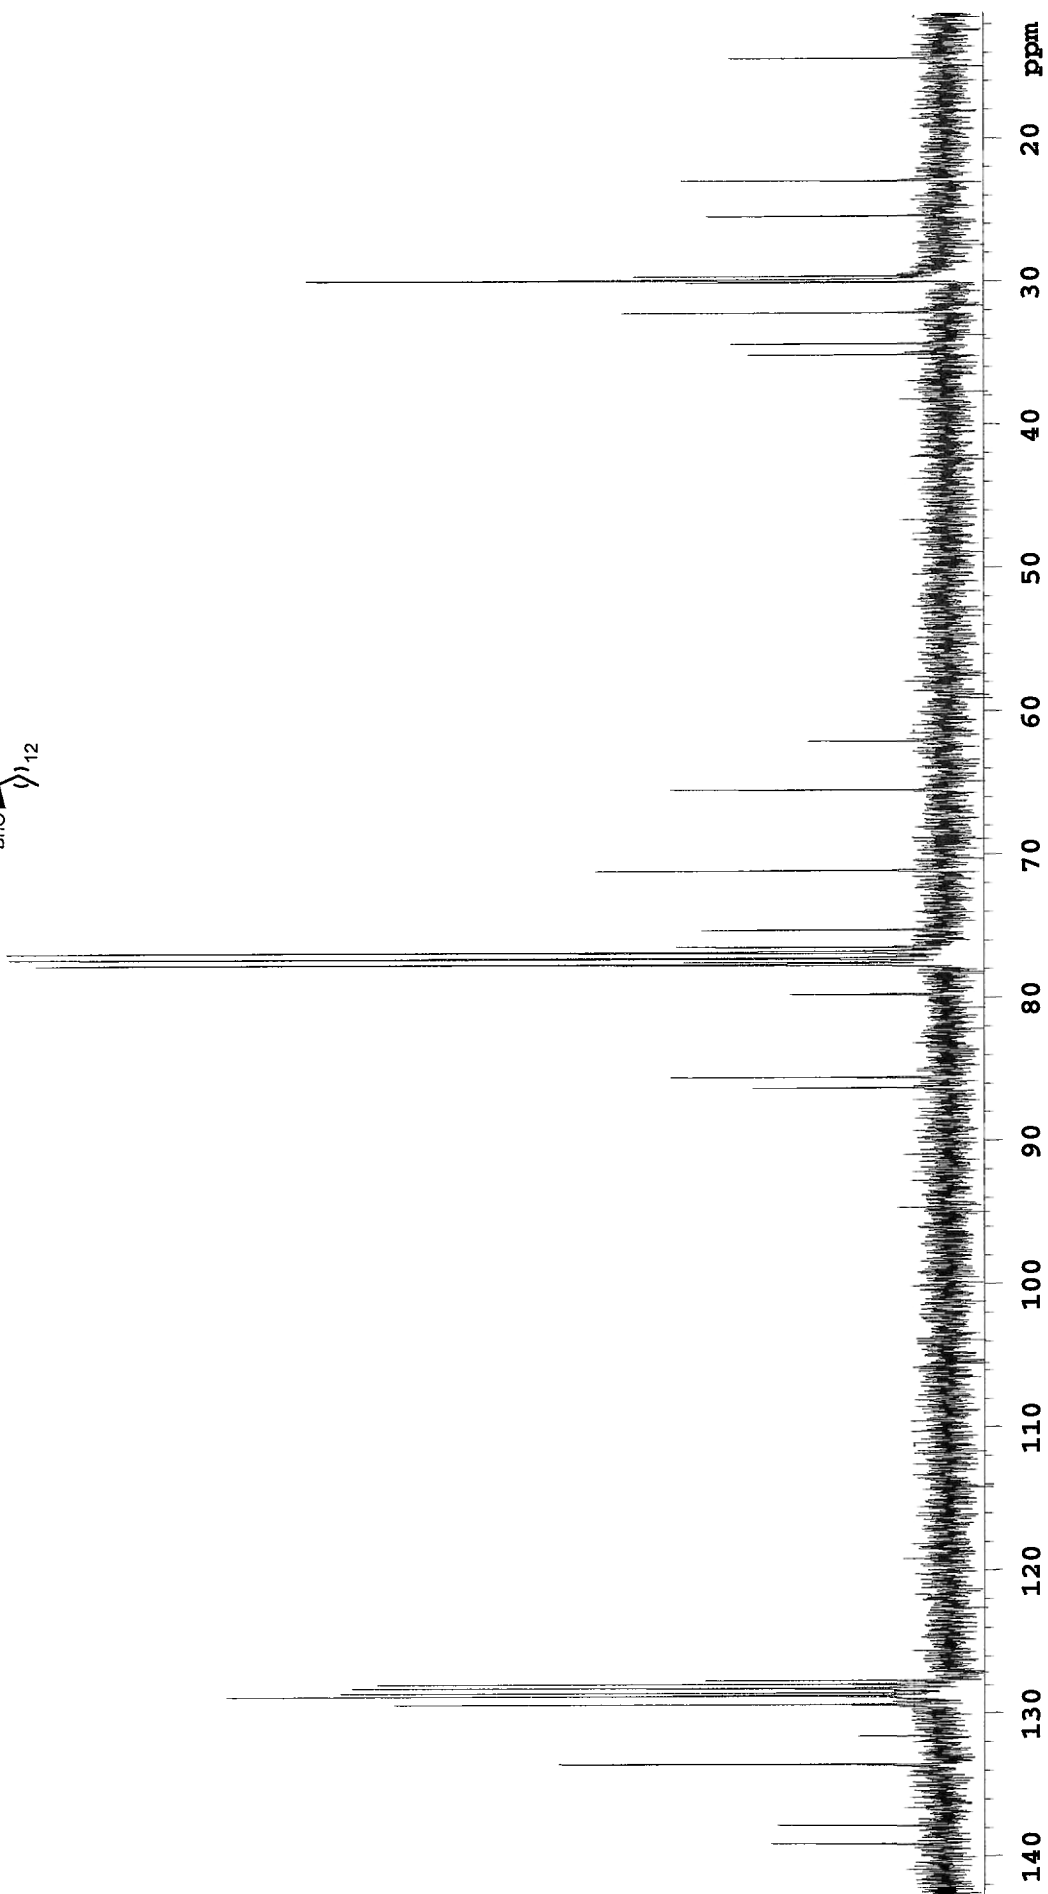





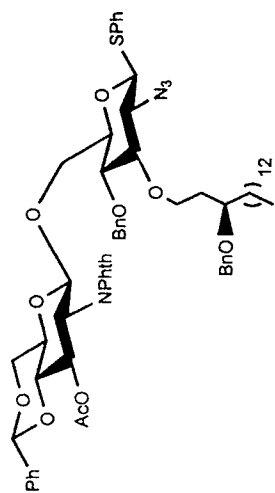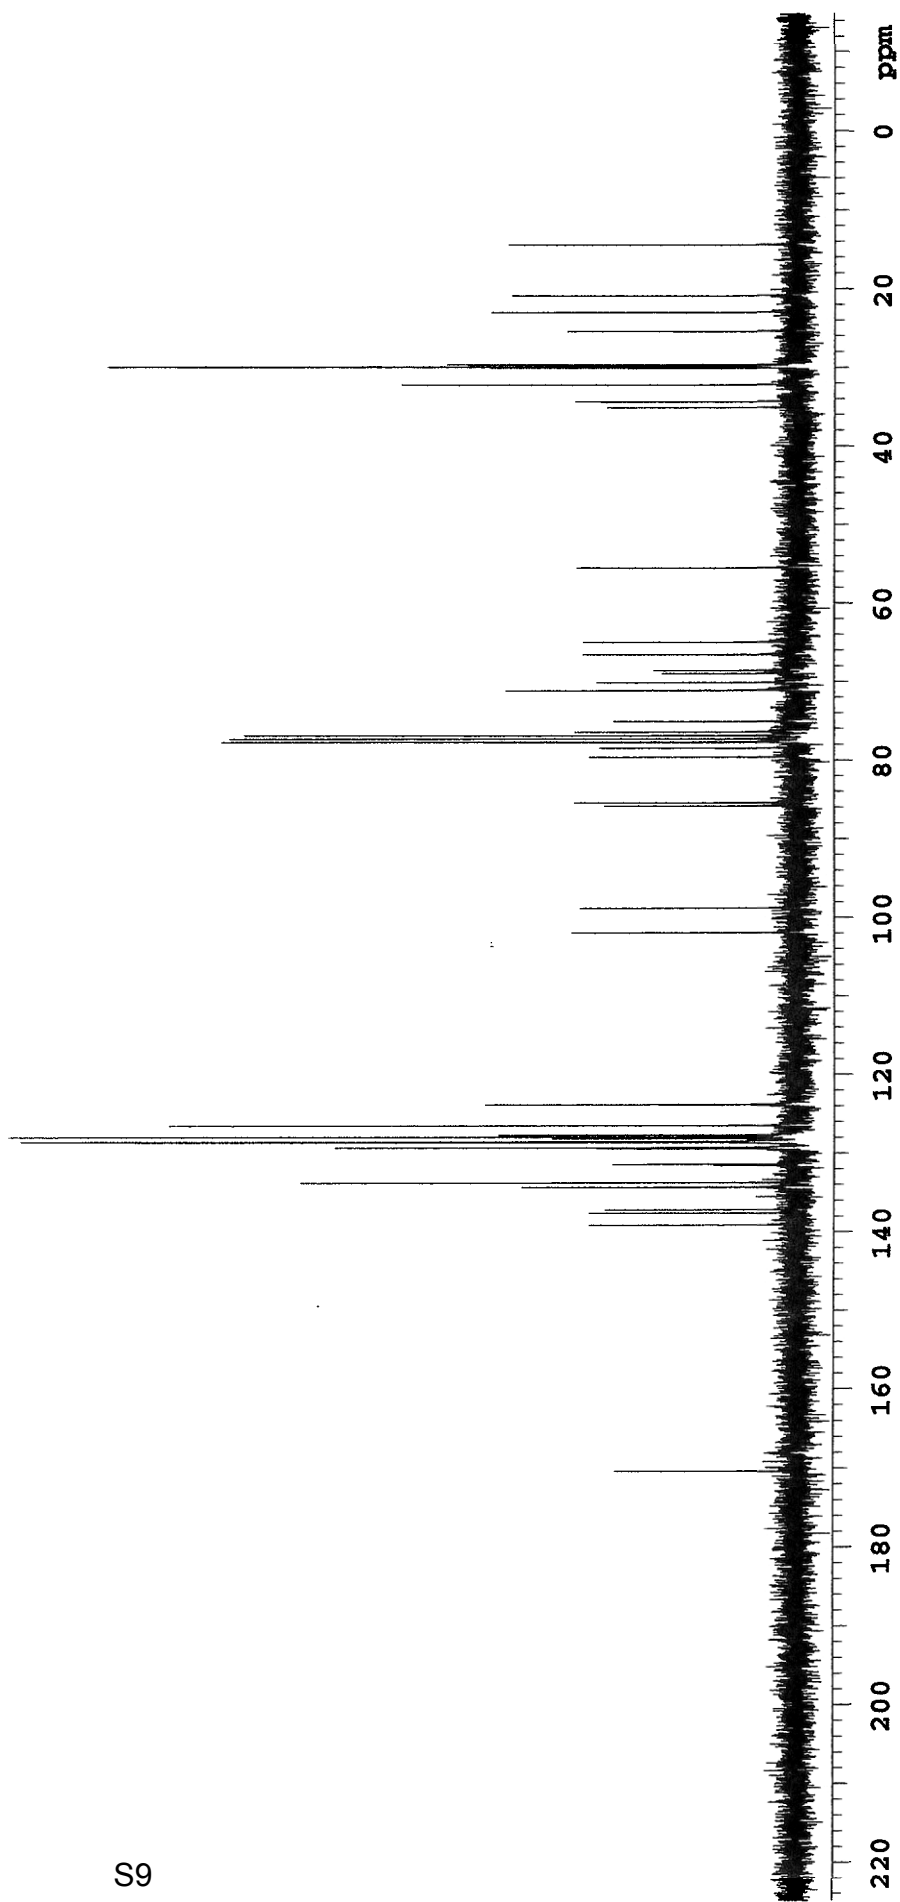



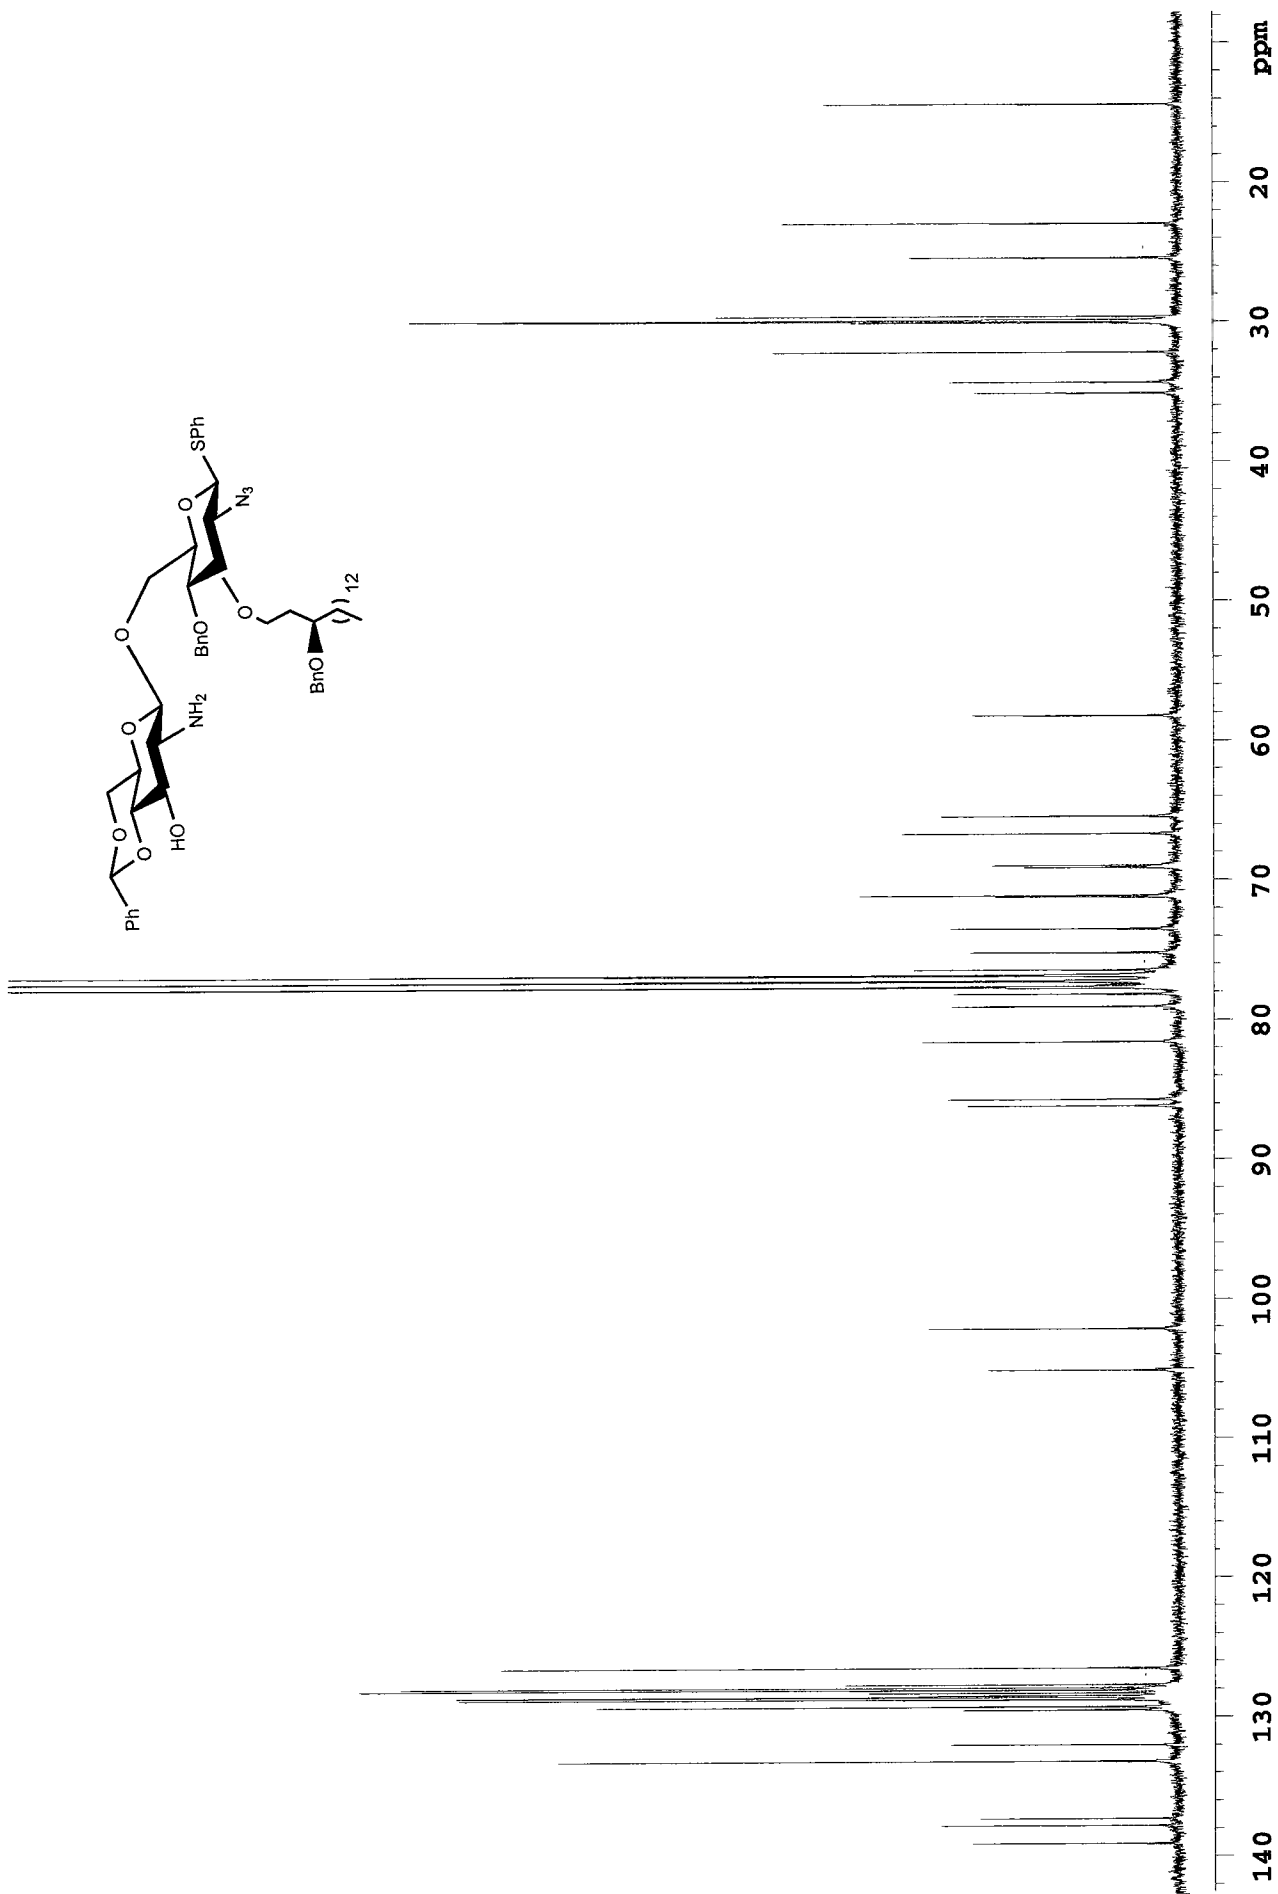

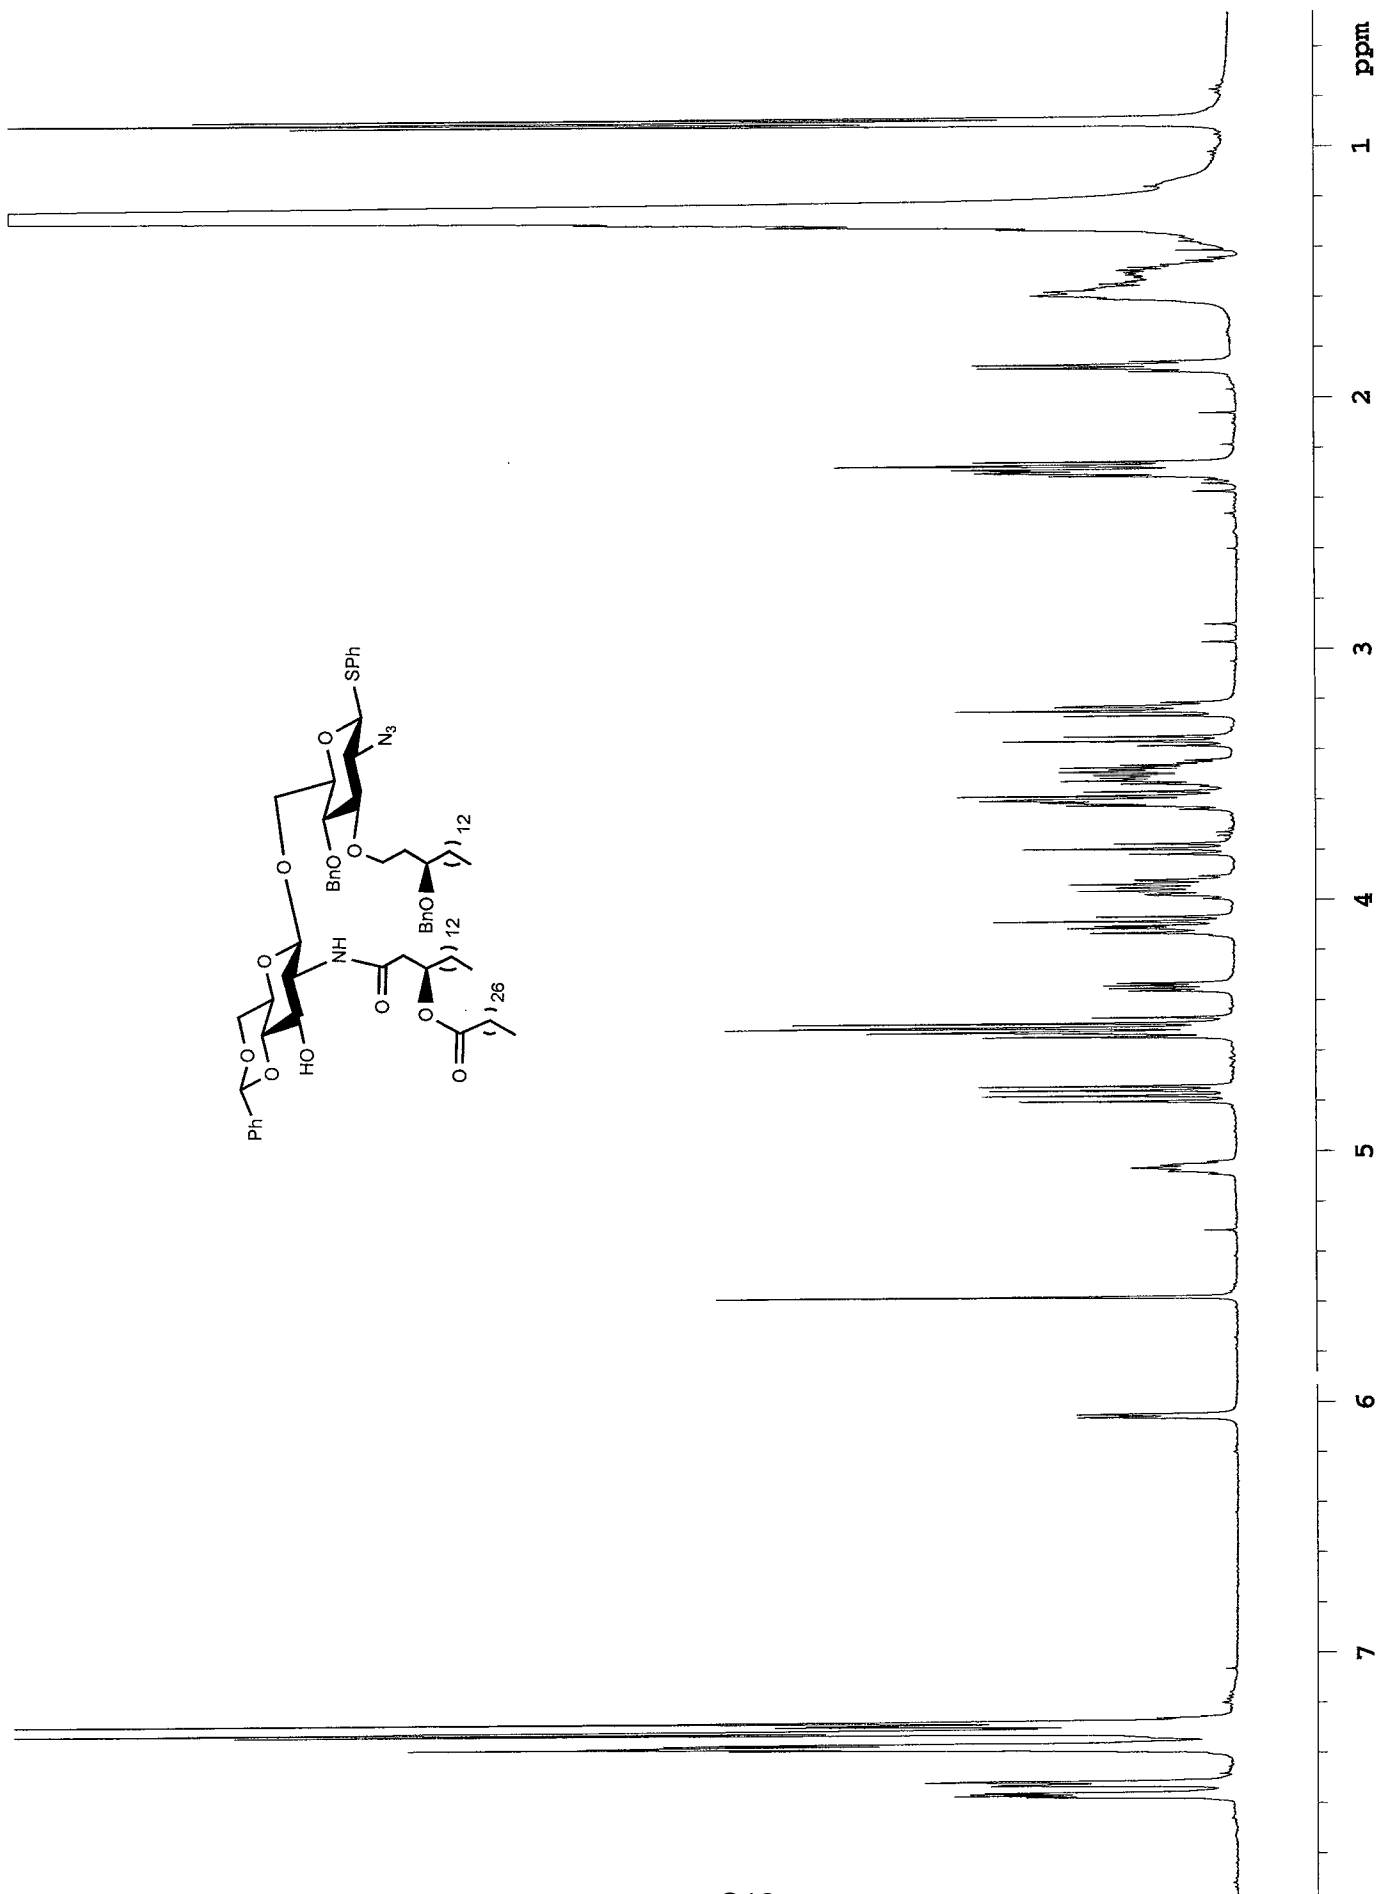

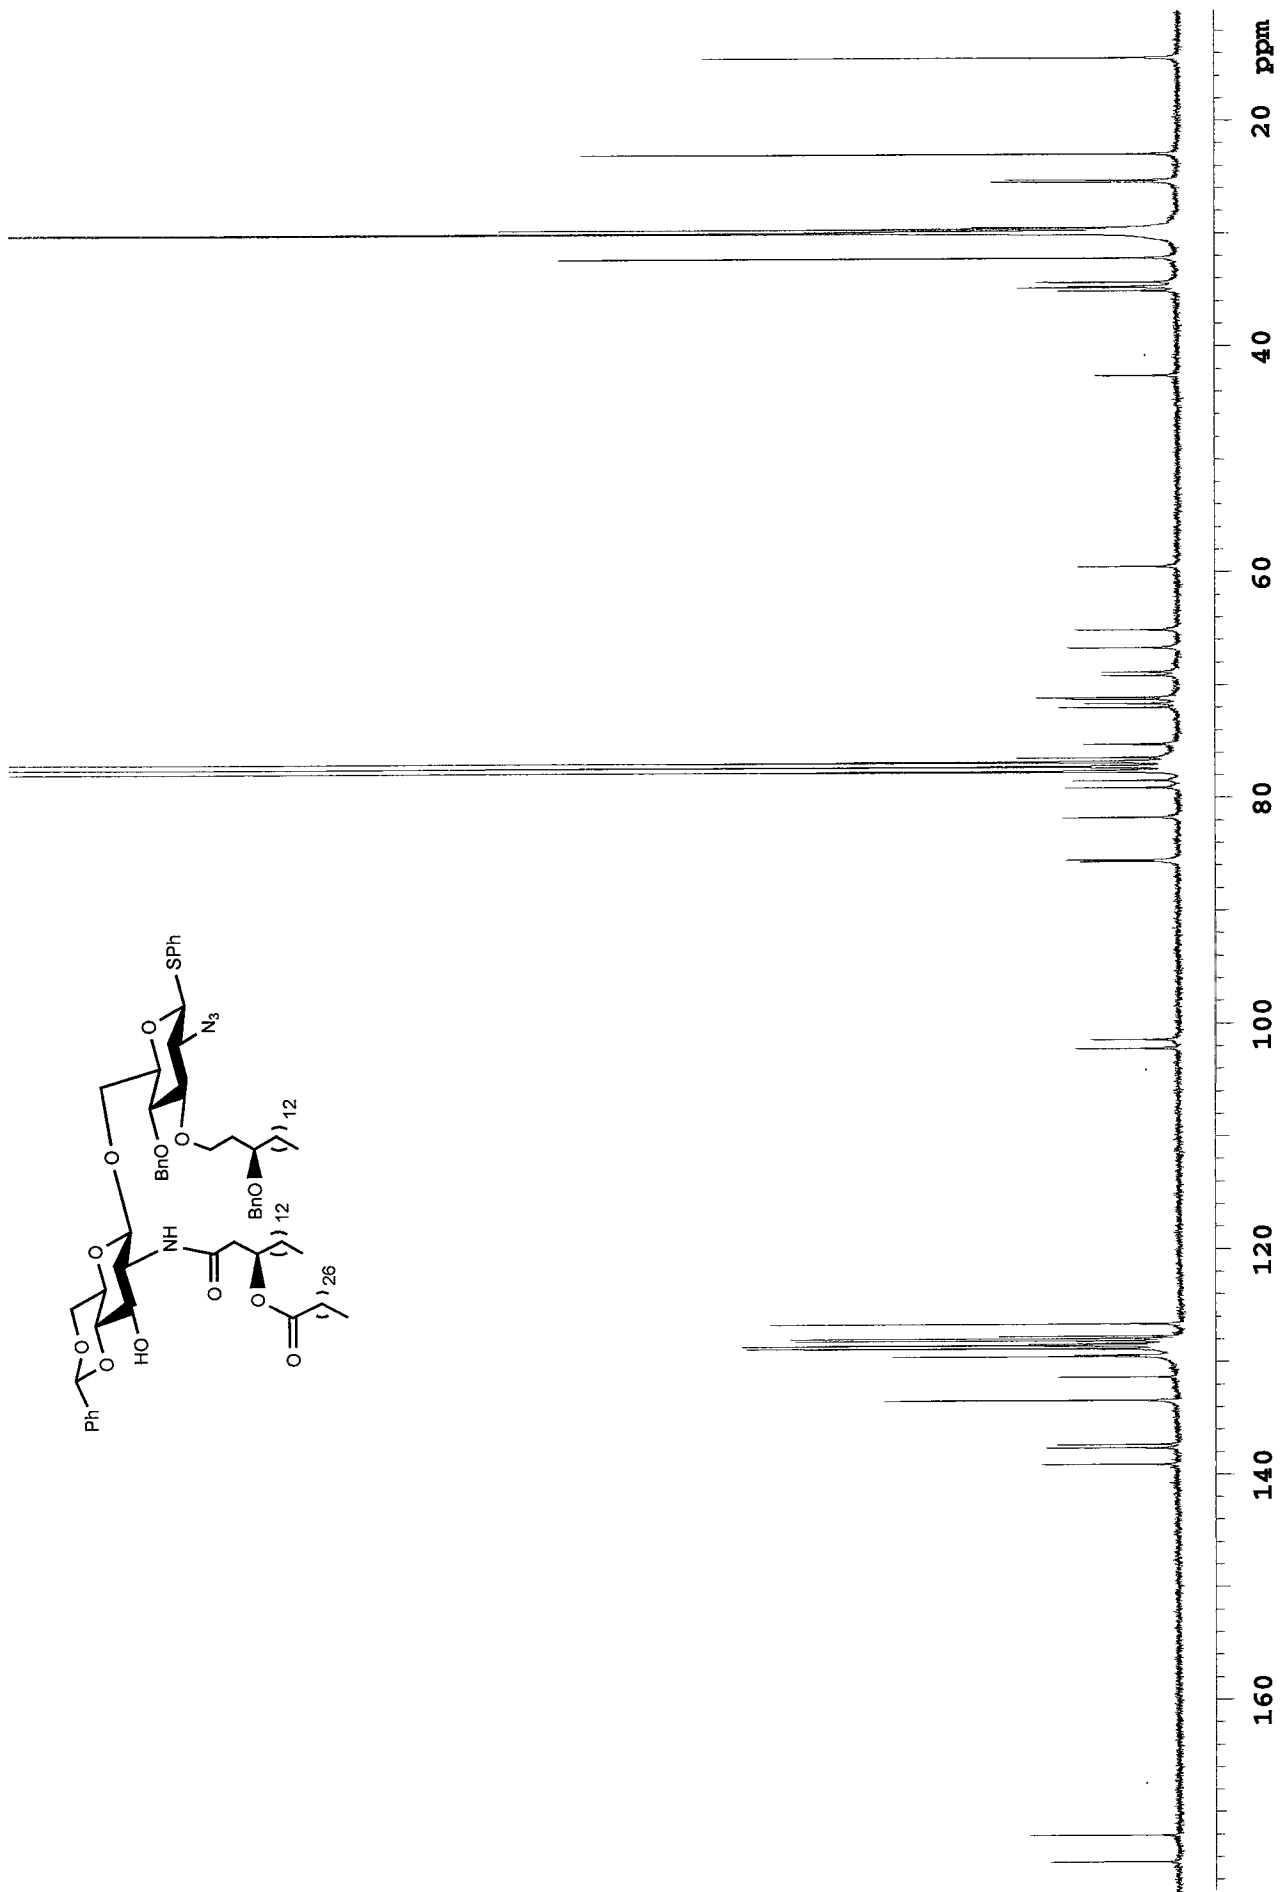



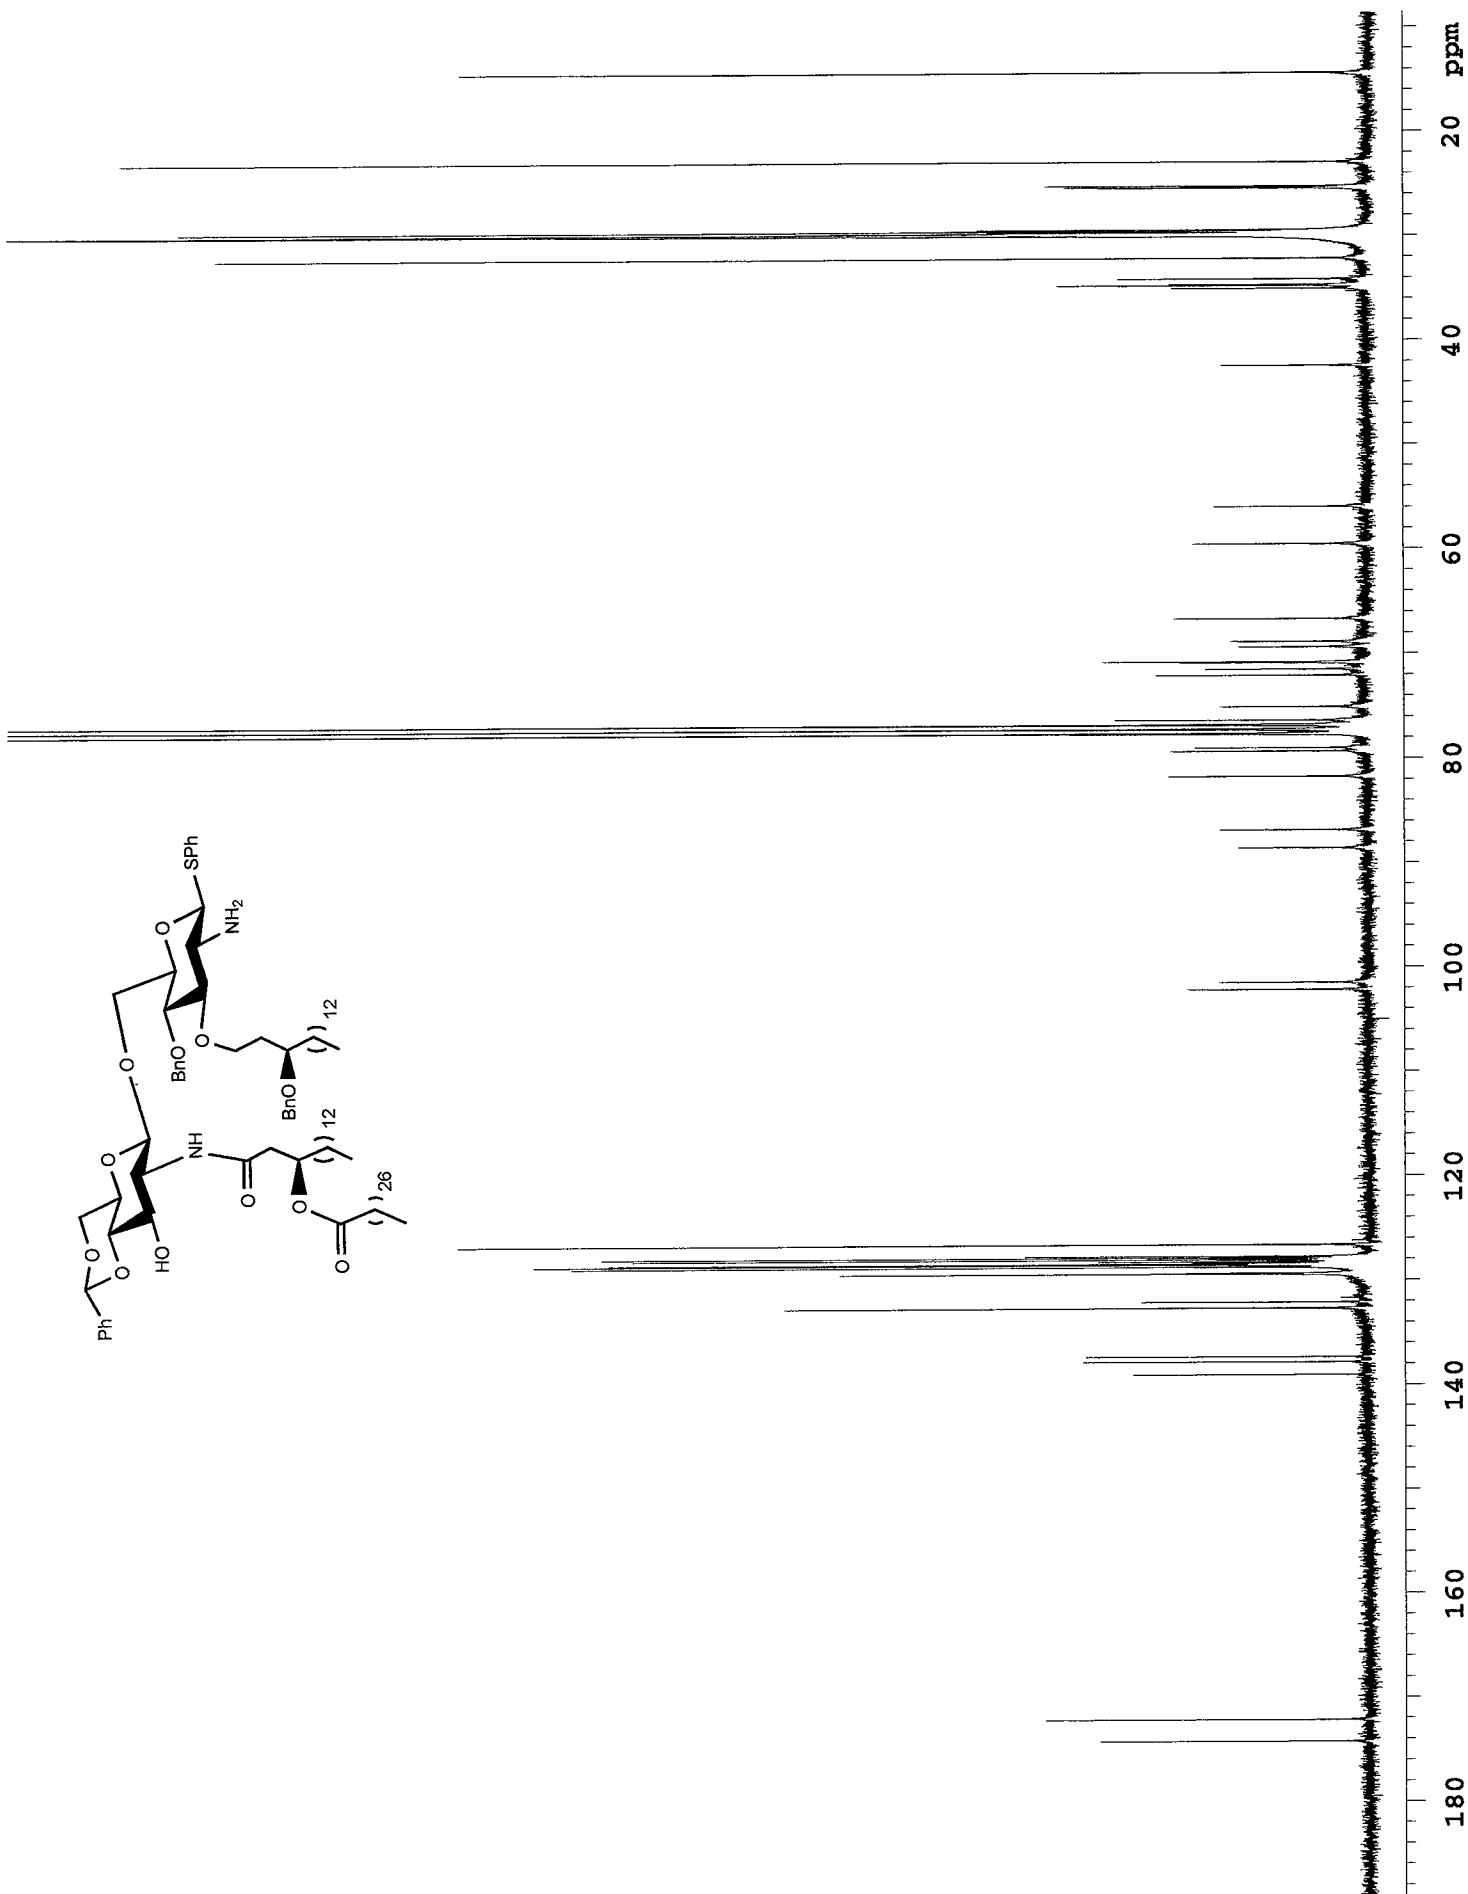





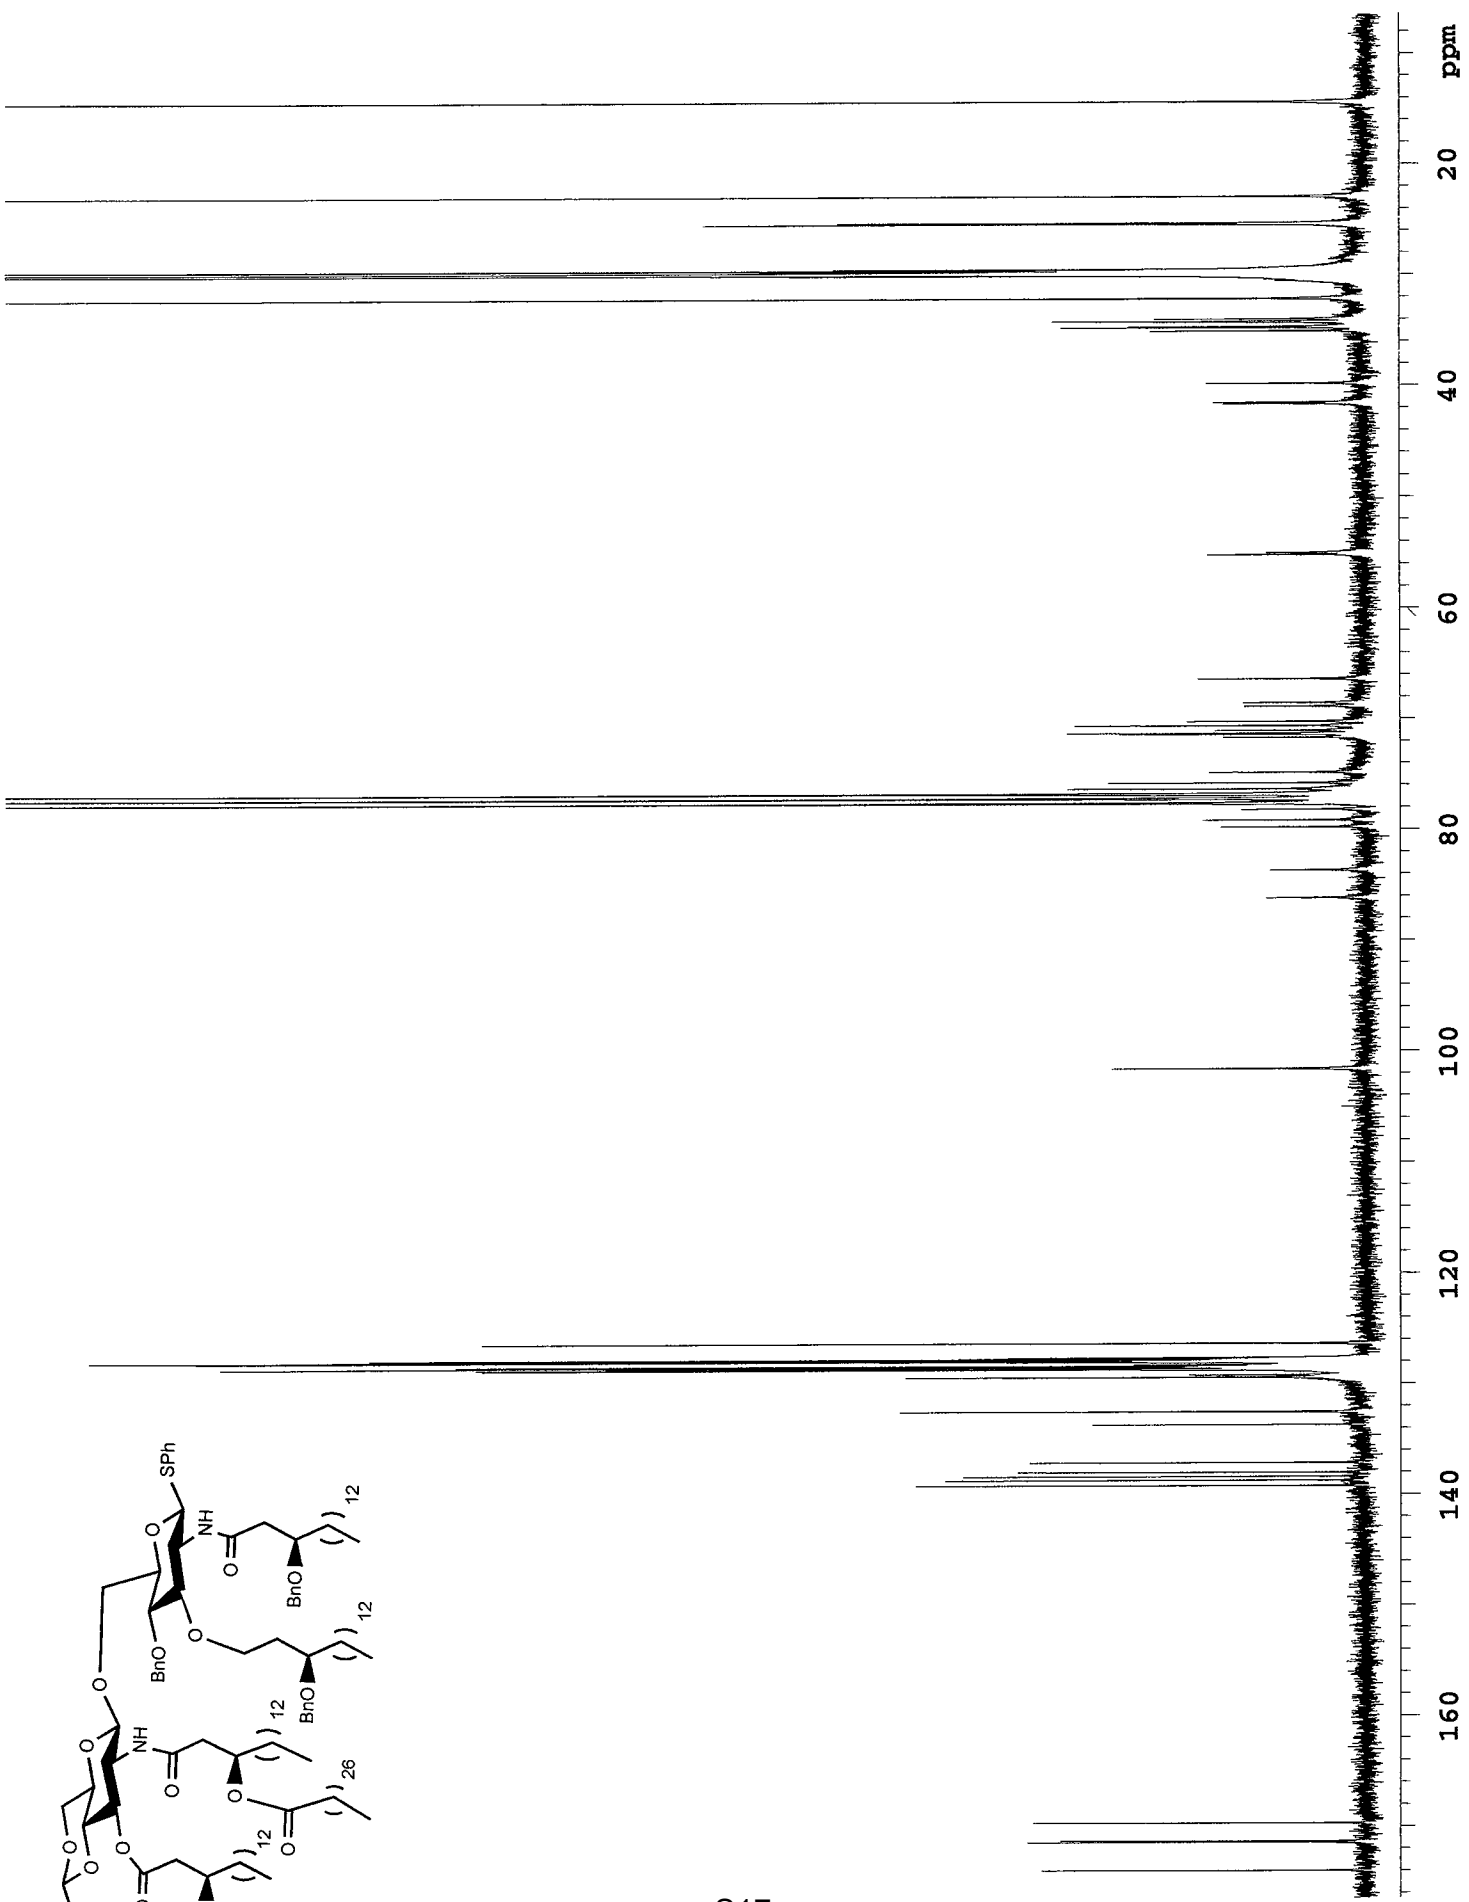

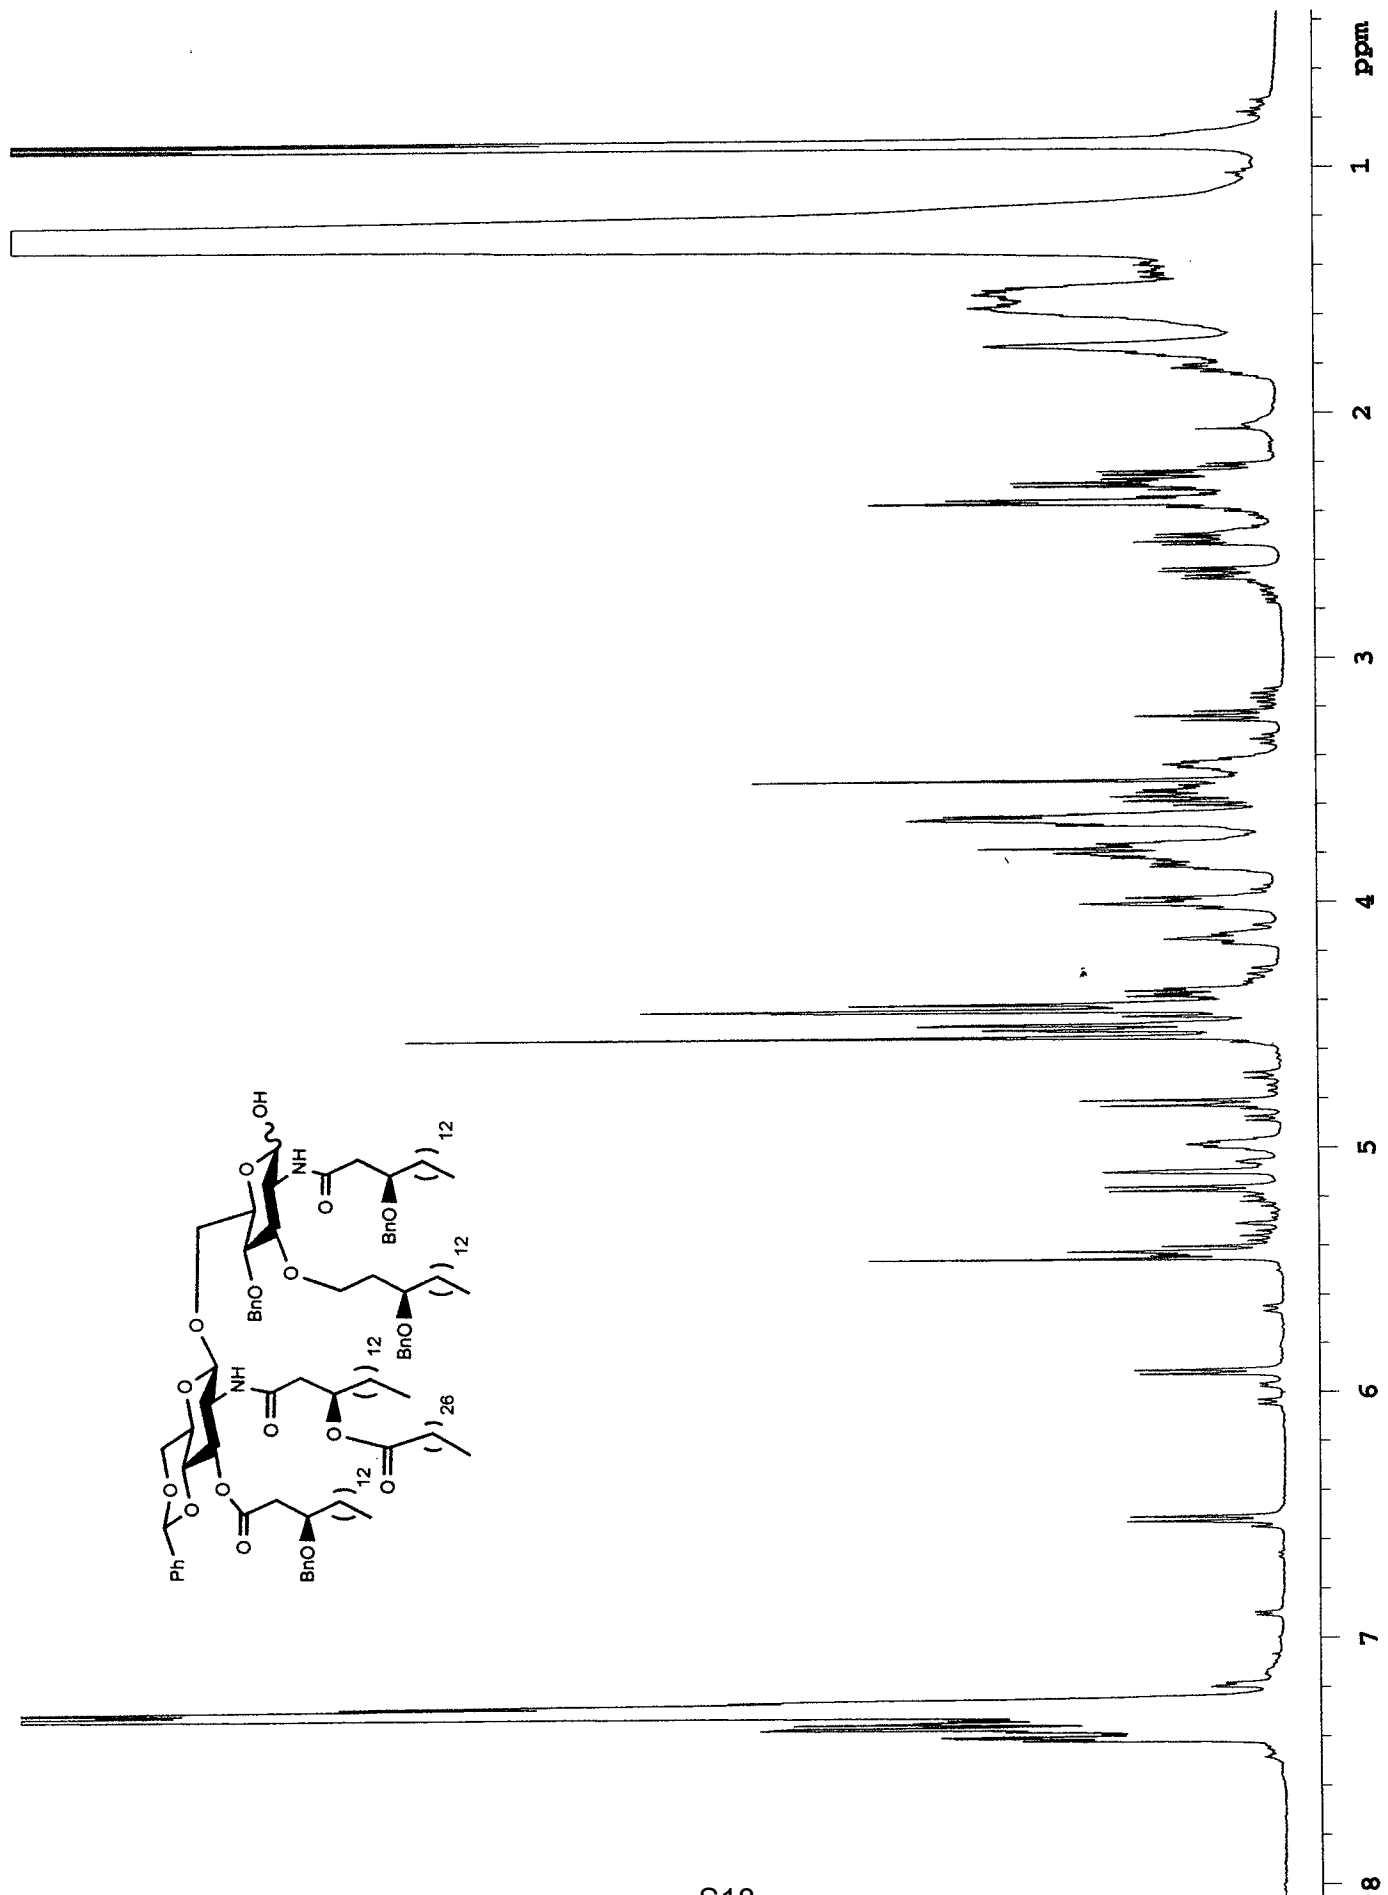



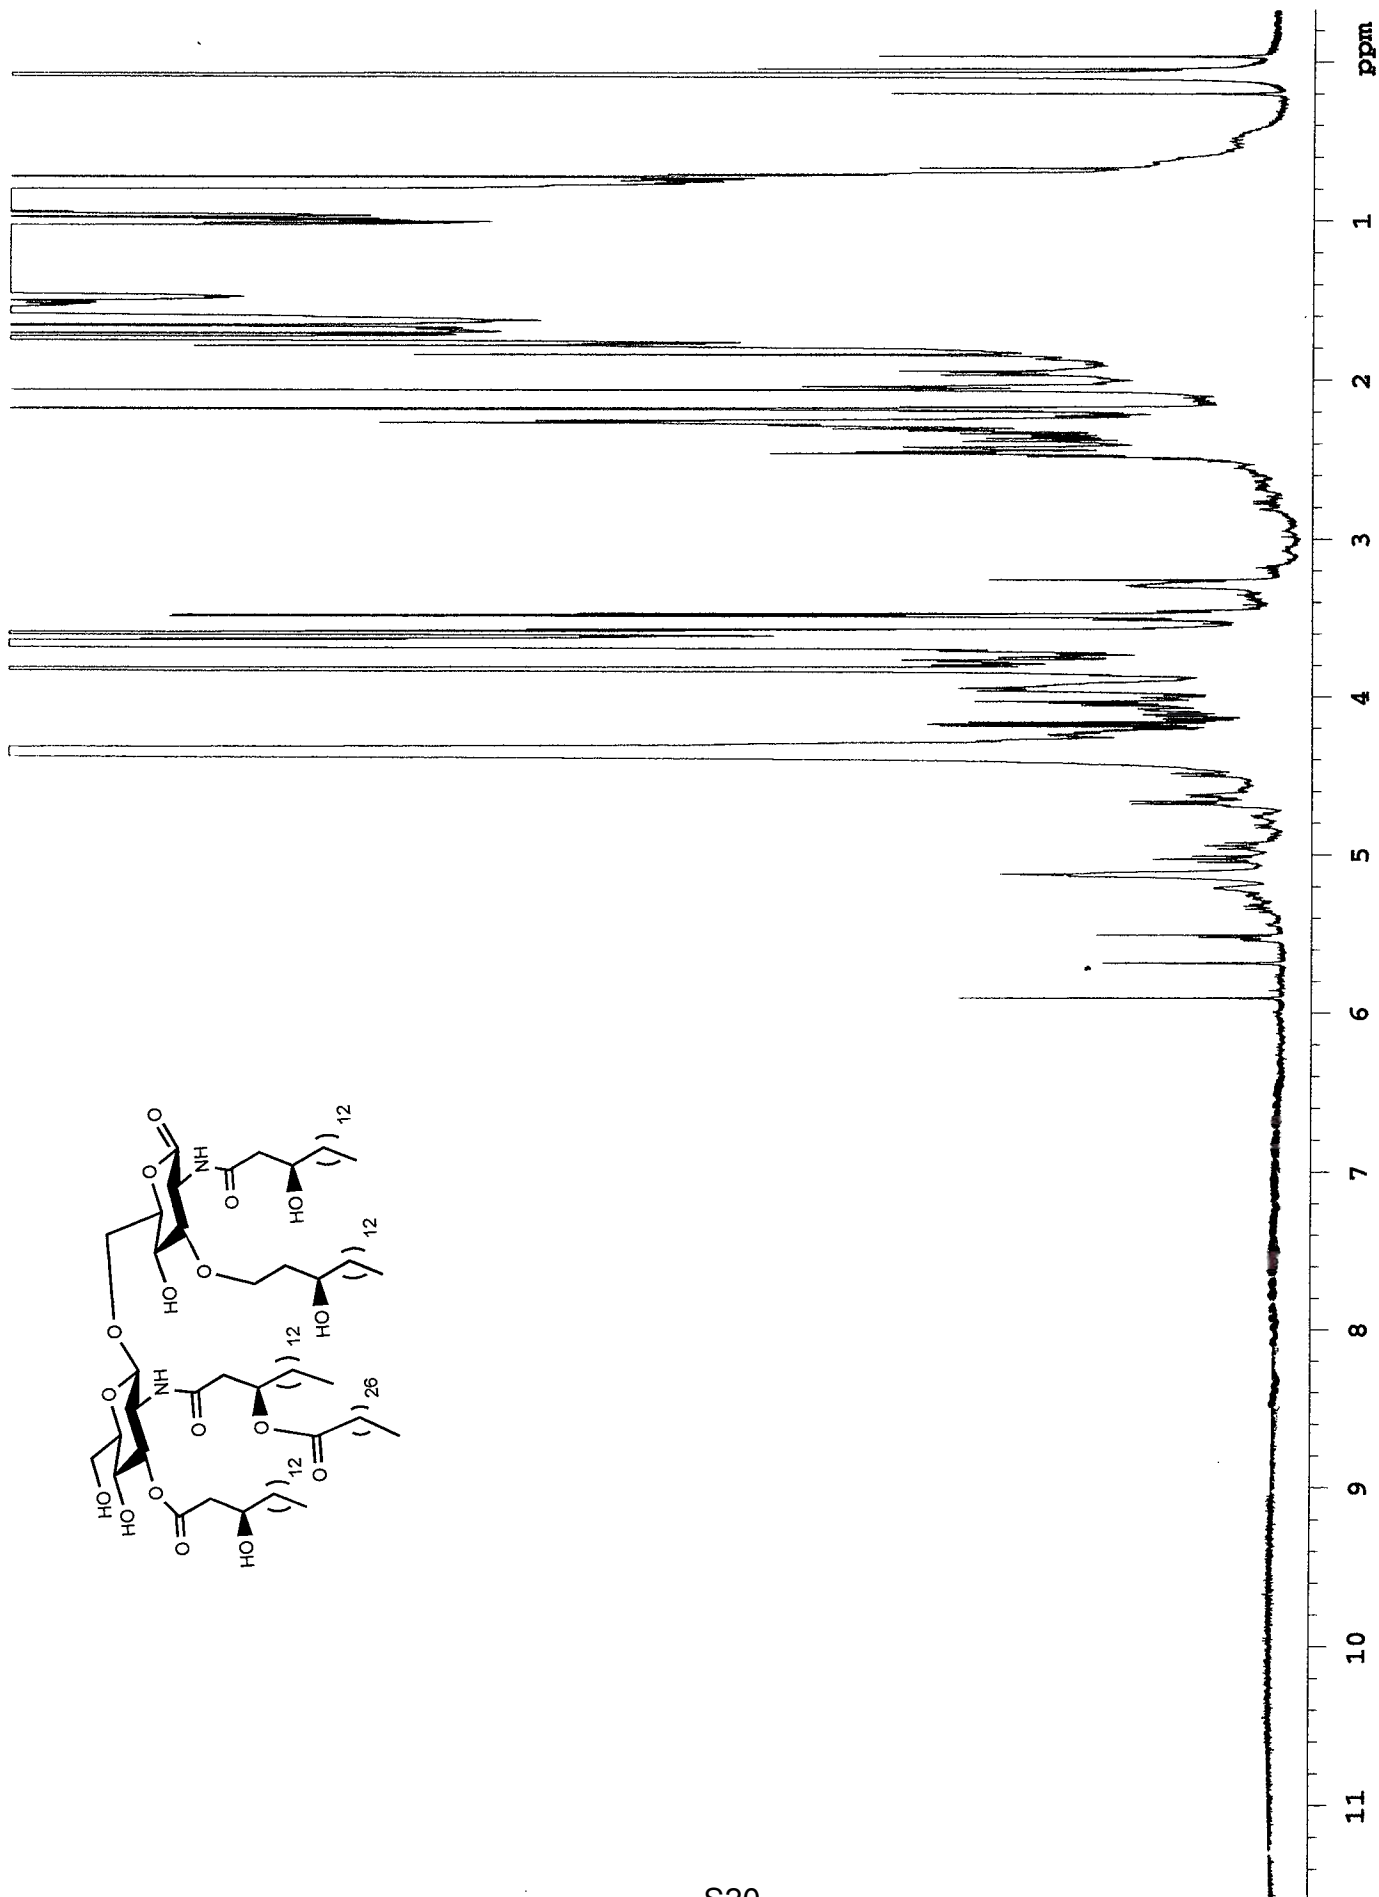

Supplement: b704427e.pdf [file b704427e.pdf]
